# Supplementary material for: A SUPERMAN-like Gene Controls the Locule Number of Tomato Fruit
Source: MDPI journal article supplement (doi:10.3390/plants12183341), 2023-09-21
Supplement: s1 [file s1]

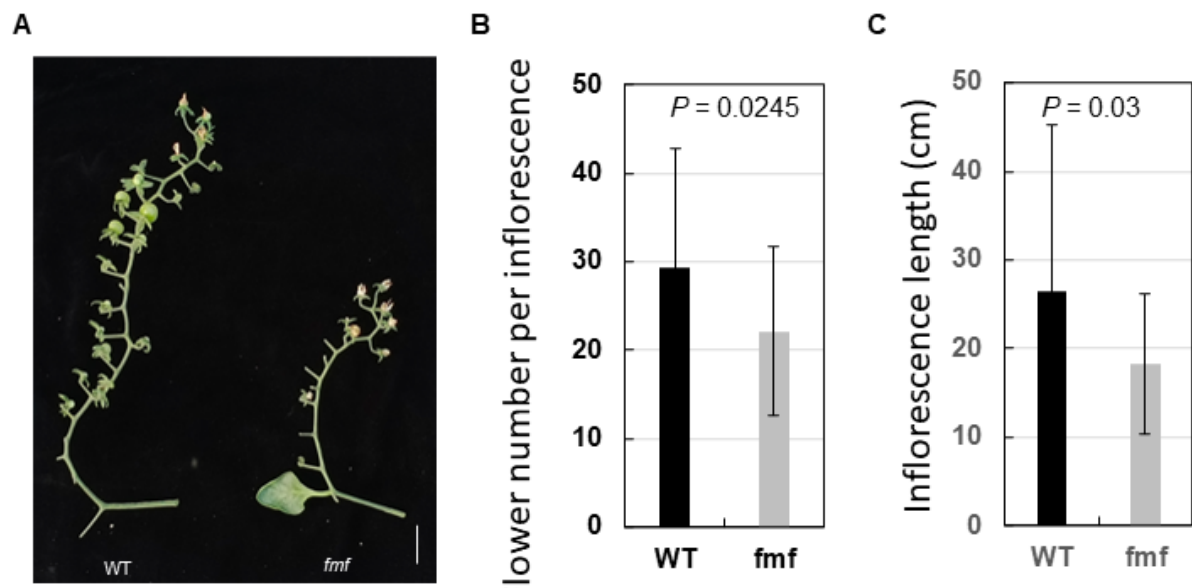

**Figure S1. Inflorescence phenotype of *fmf* and wild type.**

**A**, inflorescences of wild type and *fmf*. **B**, flower number per inflorescence of wild type and *fmf* plants. **C**, length of wild type and *fmf* inflorescences. The 3<sup>rd</sup> to 5<sup>th</sup> inflorescences from 10 wild type and 10 *fmf* plants were measured, respectively. Data represent means  $\pm$ SD. *P* values were calculated using Student's *t*-test. Scale bar, 1 cm.

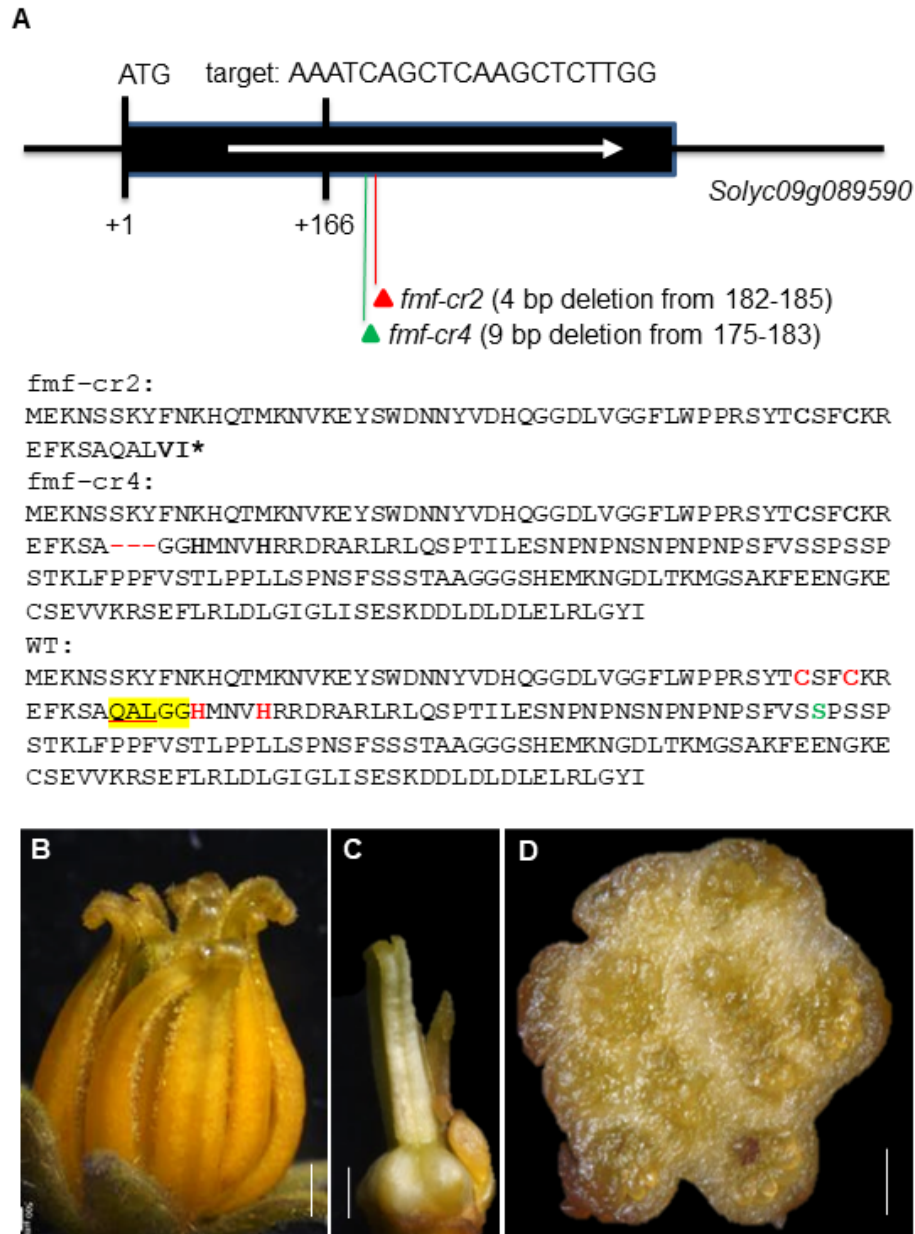

**Figure S2. Generations of *fmf* mutants by CRISPR-CAS9.**

**A**, generation of *fmf* mutants by gene editing. Two different alleles were obtained. The two alleles show identical phenotypes, which *fmf-cr2* likely encodes truncated protein and *fmf-cr4* encodes a protein missing three amino acids (QAL) in the conserved C<sub>2</sub>H<sub>2</sub> domain. The *fmf-cr2* phenotypes was shown in **Figure 6**. **B-D**, images showing abnormal floral phenotypes of the *fmf-cr4* mutant in Moneymaker background. Scale bar, 500  $\mu$ m.

**Table S1. Primers for DNA markers used in this study.**

| Primers  | chr | Sequences (5'--3')        | pair     | Tm   | Chromosome position                   | Fragment size |
|----------|-----|---------------------------|----------|------|---------------------------------------|---------------|
| XPS2448F | 9   | TCCTATTTTGCTAGTTTGTGTACA  | XPS2448R | 56.3 | SL4.0ch09:64554696..64554845,64554726 | 86bp/150bp    |
| XPS2448R | 9   | AAGAGTTGTAACATGCACGA      |          | 55.3 |                                       |               |
| XPS2450F | 9   | CTGTTTCATGTCATCTCTCTTGA   | XPS2450R | 56.3 | SL4.0ch09:62245187..62245362,62245257 | 176bp/135bp   |
| XPS2450R | 9   | ACCAACTTCAGTCGCTCTTT      |          | 57.4 |                                       |               |
| XPS2451F | 9   | GATGCGTTTAGATTCTGAAGGT    | XPS2451R | 57.1 | SL4.0ch09:63284970..63285196,63285092 | 227bp/170bp   |
| XPS2451R | 9   | AGAAGGAAACAGAGACACAAC     |          | 57.2 |                                       |               |
| XPS2452F | 9   | TGTCTTTCGAATTTACATGTGT    | XPS2452R | 54.3 | SL4.0ch09:65479794..65479953,65479840 | 160bp/117bp   |
| XPS2452R | 9   | AGCGATGAACATAGAAACGA      |          | 54.9 |                                       |               |
| XPS2462F | 9   | CCCATAGTAATTGAGCATGTAAGG  | XPS2462R | 59.0 | SL4.0ch09:65920134..65920268,65920143 | 213bp/350bp   |
| XPS2462R | 9   | CAGCAACAATAATCGGCAAA      |          | 59.7 |                                       |               |
| XPS2465F | 9   | CGGGATGAGTTATTCCACCA      | XPS2465R | 60.7 | SL4.0ch09:64998774..64998949,64998858 | 174bp/112bp   |
| XPS2465R | 9   | GGAGTCGTTTGGTGTGAGGT      |          | 60.0 |                                       |               |
| XPS2466F | 9   | TTGGGTAAACTTTCACATATTCACA | XPS2466R | 59.7 | SL4.0ch09:67499665..67499745,67499665 | 163bp/117bp   |
| XPS2466R | 9   | TTCAACTCACTTATTCCACACCA   |          | 59.5 |                                       |               |
| XPS2481F | 9   | CATTGACAGTTGATTTGGCTTT    | XPS2481R | 59.1 | SL4.0ch09:60289700..60290300,60289953 | 212bp/342bp   |
| XPS2481R | 9   | TCGAGTCCTTGCAGAGTTCTT     |          | 59.2 |                                       |               |
| XPS2483F | 9   | TGTGACGAAGCGTGTTTGA       | XPS2483R | 60.0 | SL4.0ch09:65308300..65308999,65308603 | 250bp/166bp   |
| XPS2483R | 9   | ACTCGATGCTTGATATTTGTATTG  |          | 57.5 |                                       |               |
| XPS2487F | 9   | GGTCGCATTTGTTGATACGATAC   | XPS2487R | 60.6 | SL4.0ch09:64638298..64638870,64638584 | 180bp/147bp   |
| XPS2487R | 9   | CGCCACGTGCACATAAAA        |          | 60.3 |                                       |               |

|          |   |                          |          |      |                                       |                                  |
|----------|---|--------------------------|----------|------|---------------------------------------|----------------------------------|
| XPS2495F | 9 | TGATTCGTGGAAAGTGACAAA    | XPS2495R | 59.2 | SL4.0ch09:64641996                    | 441bp/100+339bp,<br>cut by HinFI |
| XPS2495R | 9 | AAAATGGAGAGGGGAGTGGT     |          | 59.8 |                                       |                                  |
| XPS2496F | 9 | AGGAAGGTTGGGAAGTTGCT     | XPS2496R | 60.1 | SL4.0ch09:64646502                    | 299bp/73+226bp,<br>Cut by StyI   |
| XPS2496R | 9 | TCTGGCTGTCCGTTCTTCTT     |          | 60.0 |                                       |                                  |
| XPS2515F | 9 | GCGTAATTCG TTCAGGTAATTTT | XPS2515R | 59.8 | SL4.0ch09:65395877..65396106,65395992 | 143bp/197bp                      |
| XPS2515R | 9 | G TAGTTTTGGGTGAGCTGGTTT  |          | 59.6 |                                       |                                  |

---
